# Supplementary material for: MicroRNA203a suppresses glioma tumorigenesis through an ATM-dependent interferon response pathway
Source: Oncotarget. 2017 Dec 6;8(68):112980–91. doi: 10.18632/oncotarget.22945 (PMC5762567; doi:10.18632/oncotarget.22945)
Supplement: Supplementary file 1 [file oncotarget-08-112980-s001.pdf]

## MicroRNA203a suppresses glioma tumorigenesis through an ATM-dependent interferon response pathway

### SUPPLEMENTARY MATERIALS

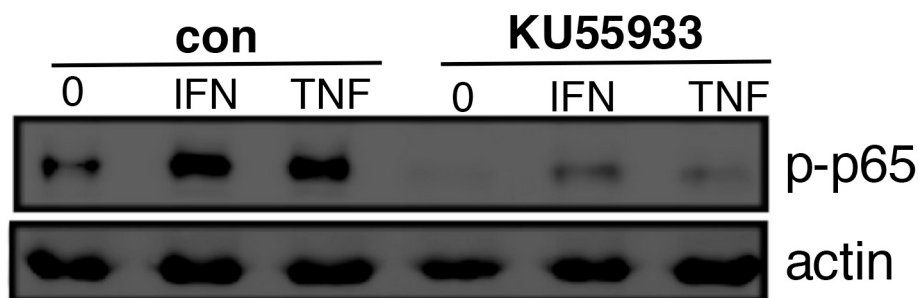

**Supplementary Figure 1: KU55933 treatment blocks the induction of NFκB activity.** Cell lysates were prepared from MT330 cells treated with IFN (1000 IU/ml), or TNF (20 ng/ml) in the presence or absence of the ATM inhibitor (10 μM KU55933, 1 hr pretreatment), and immunoblotted with an antibody specific for phosphorylated p65.

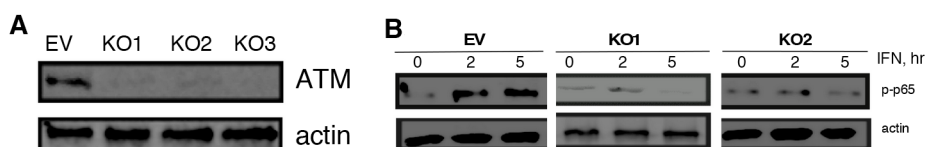

**Supplementary Figure 2: Characterization of ATM-KO SJG2 cells.** (A) Cell lysates were prepared from pools of ATM-KO SJG2 cells using different gRNAs and immunoblotted as indicated. (B) Lysates were prepared from ATM-KO1 or ATM-KO2 cells, and immunoblotted with an antibody specific for phosphorylated p65.

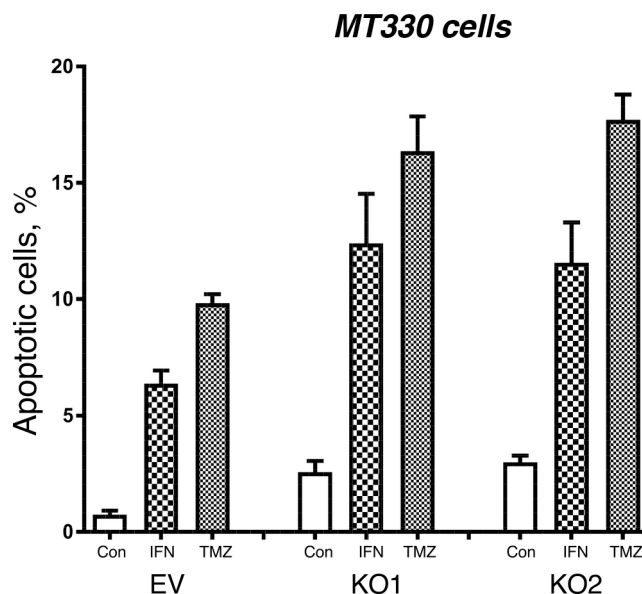

**Supplementary Figure 3: The effects of ATM-KO on the induction of apoptosis.** MT330 cells were treated for 24 hr with IFN (1,000 IU/ml) or TMZ (100 μM), and apoptosis was monitored by flow cytometry using the Annexin V-FITC apoptosis detection kit (BD Biosciences).

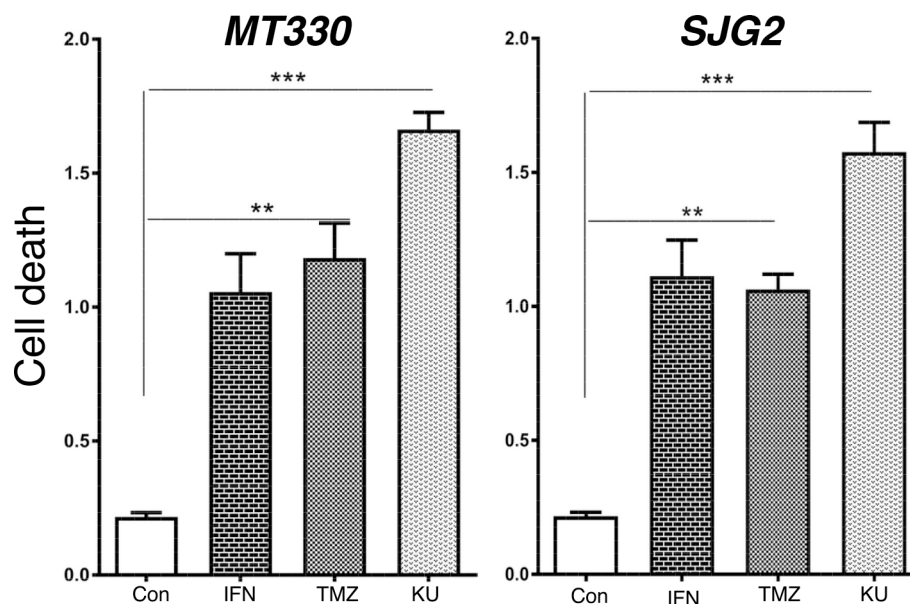

**Supplementary Figure 4: The effects of ATM inhibition on the induction of apoptosis.** GBM cells were treated for 24 hr with IFN (1,000 IU/ml), TMZ (100  $\mu$ M) or KU55933 (10  $\mu$ M) and analyzed for apoptosis by cell death detection ELISA assays.

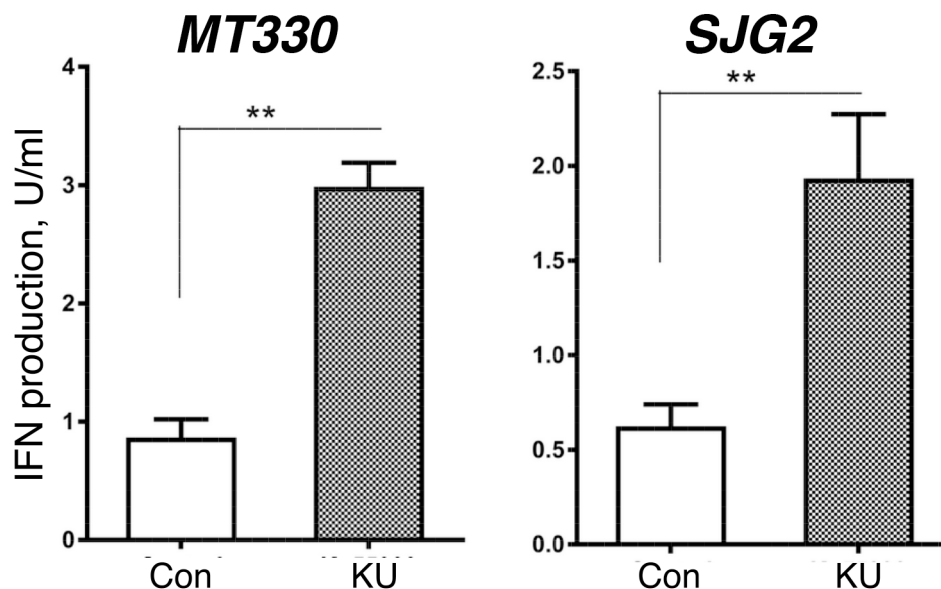

**Supplementary Figure 5: The effects of ATM inhibition on the induction of IFN gene expression.** Media from GBM cells treated for 24 hr with KU55933 (10  $\mu$ M) was assayed on human CaKi cells expressing an ISRE-driven luciferase reporter construct, and results expressed as IFN IU/ml.

**Supplementary Table 1: Genes induced by enforced miR203a expression in MT330 and SJG2 GBM cells.**

**See Supplementary File 1**
